# Supplementary material for: Comparative efficacy and acceptability of psychosocial treatments for disruptive behaviour disorders in children and adolescents: study protocol for a systematic review and network meta-analysis
Source: HighWire-hosted journal article supplement (doi:10.1136/bmjopen-2020-046091), 2021-06-01
Supplement: bmjopen-2020-046091supp001_data_supplement.pdf [file bmjopen-2020-046091supp001_data_supplement.pdf]

Table S1 Descriptions and examples of common psychosocial treatment types and control conditions

| Treatments                   | Abbreviation | Description                                                                                                                                                                                    | Example (review or meta-analysis or trails) |
|------------------------------|--------------|------------------------------------------------------------------------------------------------------------------------------------------------------------------------------------------------|---------------------------------------------|
| Art Therapy                  | AT           | AT uses art medium, including drawing, painting, clay to enable psychological change and personal growth of children and adolescents.                                                          | Moula <sup>1</sup>                          |
| Behavioral Therapy           | BT           | BT trains participants (children and adolescents, parents, teachers, etc.) using behavior management techniques such as differential reinforcement.                                            | Axberg and Broberg <sup>2</sup>             |
| Cognitive Behavioral Therapy | CBT          | CBT combines BT with CT. CBT techniques commonly involve social skill training, cognitive restructuring, problem-solving, anger management.                                                    | Chen et al. <sup>3</sup>                    |
| Family Therapy               | FT           | FT works with youths and their families, in order to address family dysfunction by changing maladaptive patterns of interaction between family members, like parent-child interaction therapy. | van der Pol et al. <sup>4</sup>             |
| Mindfulness                  | MBT          | MBT trains youths' attentional awareness, strengthens the capacity of emotional and behavioral regulation and generates a shift in one's view of self.                                         | Simpson et al. <sup>5</sup>                 |
| Multisystemic Therapy        | MST          | MST targets to address problems regarding environmental systems.                                                                                                                               | Tan and Fajardo <sup>6</sup>                |
| Narrative Therapy            | NAT          | NAT uses narrative techniques like storytelling to cope with children and adolescents' aggression and anger.                                                                                   | Hosseini et al. <sup>7</sup>                |
| Play Therapy                 | PT           | PT copes with aggressive behavior, hostility, anger, etc. in recreational activities.                                                                                                          | Bagherizadeh et al. <sup>8</sup>            |
| Psychodynamic Therapy        | DYN          | DYN emphasizes youths' unconscious feelings and the effect of unconscious feelings on their behavior and emotions.                                                                             | Weitkamp et al. <sup>9</sup>                |
| Psychoeducation              | PE           | PE provides education or information to participants.                                                                                                                                          | van der Put <sup>10</sup>                   |
| Control Conditions           |              |                                                                                                                                                                                                |                                             |
| Treatment as Usual           | TAU          | TAU represents an usual treatment. It may involve in some components of psychosocial treatment and have some treatment effects, but is not a structured or formal psychosocial treatment.      | -                                           |

Table S1 Descriptions and examples of common psychosocial treatment types and control conditions

| Treatments   | Abbreviation | Description                                                                                                                                                        | Example (review or meta-analysis or trails) |
|--------------|--------------|--------------------------------------------------------------------------------------------------------------------------------------------------------------------|---------------------------------------------|
| Waitlist     | WL           | WL means that participants in this control group receive any psychosocial treatments during the study, but are told they will receive one when the study finishes. | -                                           |
| No treatment | NT           | NT stands for that neither during the study nor the study finishes, participants in this control group will not receive any psychosocial treatments.               | -                                           |

## References

1. Moula Z. A systematic review of the effectiveness of art therapy delivered in school-based settings to children aged 5-12 years. *International journal of art therapy* 2020;25:88-99.
2. Axberg U, Broberg AG. Evaluation of “The Incredible Years” in Sweden: the transferability of an American parent-training program to Sweden. *Scand J Psychol* 2012;53:224-32.
3. Chen C, Li C, Wang H, et al. Cognitive behavioral therapy to reduce overt aggression behavior in Chinese young male violent offenders. *Aggress Behav* 2014;40:329-36.
4. van der Pol TM, Hoeve M, Noom MJ, et al. Research review: the effectiveness of multidimensional family therapy in treating adolescents with multiple behavior problems - a meta-analysis. *J CHIL D PSYCHOL Psychiatry* 2017;58:532-45.
5. Simpson S, Mercer S, Simpson R, et al. Mindfulness-based interventions for young offenders: a scoping review. *Mindfulness* 2018;9:1330-43.
6. Tan JX, Fajardo MLR. Efficacy of multisystemic therapy in youths aged 10 - 17 with severe antisocial behaviour and emotional disorders: systematic review. *London J Prim Care* 2017;9:95-103.
7. Hosseini S, Naziri G, Rozdar E. Effectiveness of storytelling therapy on the reduction of aggression and stubbornness in children with oppositional defiant disorder. *Zahedan Journal of Research in Medical Science* 2014;16:83-85.
8. Bagherizadeh H, Nasab HM, Goudarzvand R. The effect of play therapy on symptoms of oppositional defiant disorder in boys aged 5 to 10 years old. *International Journal of Learning and Development* 2015;5:48-55.
9. Weitkamp K, Daniels JK, Romer G, et al. Psychoanalytic psychotherapy for children and adolescents with severe externalising psychopathology: an effectiveness trial. *Z Psychosom Med Psychother* 2017;63:251-66.
10. van der Put CE, van Solinge NFB, Stams GJ, et al. Effects of awareness programs on juvenile delinquency: a three-level meta-analysis. *Int J Offender Ther Comp Criminol* 2020:306624X-20909239X.
